# Supplementary material for: Entwicklung eines digitalen Rechtschreibtests für die erste Klasse Grundschule: Dimensionalität und Reliabilität des SCHNAPP-Rechtschreibtests
Source: Atypon-hosted journal article supplement (doi:10.1024/2235-0977/a000404), 2023-01-20
Supplement: 2235-0977_a000404_esm1.pdf [file 2235-0977_a000404_esm1.pdf]

**Tabelle S1.** Deskriptive Statistiken und Rasch Modellparameter der Erstversion des SCHNAPP-Rechtschreibtests.

| Item    | Frequenz | PR  | $\beta$ ( $SE_{\beta}$ ) | Infit | O-S $\chi^2$ | $Q3_a$ | RMSD |
|---------|----------|-----|--------------------------|-------|--------------|--------|------|
| 1 (4)   | mittel   | 78% | -1.66 (0.18)             | 1.02  | .48          | .04    | 0.03 |
| 2 (5)   | niedrig  | 86% | -2.35 (0.20)             | 0.87  | .59          | .04    | 0.03 |
| 3 (-)†  | hoch     | 68% | -0.98 (0.16)             | 0.95  | .48          | .07    | 0.03 |
| 4 (-)†  | hoch     | 78% | -1.63 (0.18)             | 0.88  | .64          | .09    | 0.03 |
| 5 (16)  | mittel   | 36% | 0.76 (0.16)              | 0.94  | .70          | .09    | 0.03 |
| 6 (7)   | mittel   | 29% | 1.17 (0.16)              | 0.99  | .48          | .10    | 0.04 |
| 7 (9)   | mittel   | 74% | -1.34 (0.17)             | 0.84  | .48          | .07    | 0.04 |
| 8 (10)  | hoch     | 58% | -0.42 (0.16)             | 1.00  | .48          | .06    | 0.04 |
| 9 (12)  | hoch     | 51% | -0.03 (0.15)             | 0.80  | .48          | .07    | 0.04 |
| 10 (-)† | hoch     | 46% | 0.23 (0.16)              | 1.06  | < .001       | .07    | 0.07 |
| 11 (11) | hoch     | 57% | -0.37 (0.16)             | 0.91  | .87          | .06    | 0.03 |
| 12 (-)† | hoch     | 51% | -0.04(0.15)              | 0.80  | .42          | .07    | 0.05 |
| 13 (6)  | mittel   | 75% | -1.44 (0.17)             | 0.89  | .48          | .04    | 0.02 |
| 14 (22) | mittel   | 75% | -1.46 (0.17)             | 0.85  | .64          | .09    | 0.04 |
| 15 (20) | niedrig  | 8%  | 3.06 (0.24)              | 0.85  | .48          | .05    | 0.02 |
| 16 (18) | hoch     | 12% | 2.58 (0.21)              | 1.07  | .48          | .05    | 0.04 |
| 17 (-)† | mittel   | 30% | 1.13 (0.16)              | 0.87  | .48          | .06    | 0.03 |

*Anmerkungen:* N = 299. Item = Itemnummer der Erstversion des SCHNAPP mit Itemnummer des revidierten SCHNAPP-Rechtschreibtests in Klammern. Frequenz = Vorkommenshäufigkeit (childlex; Schröder et al., 2015); PR = Prozentsatz richtiger Antworten;  $\beta$  ( $SE_{\beta}$ ) = Itemschwierigkeit des Rasch-Modells mit Standardfehler in Klammern; Infit = Weighted mean squared Statistik (); O-S  $\chi^2$  = p-Wert von Orlando und Thissen's (2000) Chi Quadrat Test auf Itemfit mit Bonferroni-Holm Korrektur;  $Q3_a$  = Durchschnittliche absolute Residualkorrelation (= adjustierte Q3 Statistik nach Yen); RMSD = Root mean squared deviation (Köhler et al., 2020). † In der revidierten Testform nicht inkludiert.
